# Supplementary material for: DFT Studies of p-N,N-(Dimethylamino) Benzoic Acid with Para or Meta–Electron Withdrawing or Donating Moieties for Dye-Sensitized Solar Cells (DSSCs)
Source: Hindawi journal article supplement (doi:10.1155/2022/2916191), 2022-10-22
Supplement: f1 [file 2916191.f1.zip › Renewable-Supplemnentary-Information.R2.docx]

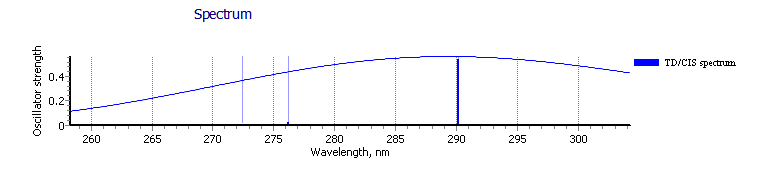


Fig.S1. Electronic absorption spectrum of the free 4-(Dimethylamino) benzoic acid using B3LYB/6-311++ G٭٭ level of theory.

Fig.S2. Electronic absorption spectrum of the free 4-(Dimethylamino) benzoic acid using PBEPBE/6-311++ G٭٭ level of

theory.

Table S1. Electronic absorption spectra of gas-phase free p-N,N-(Dimethylamino) benzoic acid using B3LYP and PBEPBE functionals with different basis sets.

| DFT Functional | Basis sets | **λmax (nm)** | **f** | Major contributions |
| --- | --- | --- | --- | --- |
| B3LYP | 6-311G | 285.2 | 0.541 | HOMO->LUMO (97%) H-1->L+1(2%) |
| 6-311G٭٭ | 282.4 | 0.519 | HOMO->LUMO (97%) |
| 6-311++G | 292.7 | 0.553 | HOMO->LUMO (97%) HOMO->L+2(81%) |
| 6-311+G٭٭ | 289.9 | 0.529 | HOMO->LUMO (97%) H-1->L+1 (3%) |
| 6-311++G٭٭ | 290.1 | 0.530 | HOMO->LUMO (97%)H-1->L+2 (3%) |
| PBEPBE | 6-311G | 316.8 | 0.465 | HOMO->LUMO (94%) |
| 6-311G٭٭ | 312.8 | 0.452 | HOMO->LUMO (94%) |
| 6-311++G | 325.3 | 0.479 | HOMO->LUMO (95%) |
| 6-311+G٭٭ | 321.3 | 0.464 | HOMO->LUMO (95%) |
| 6-311++G٭٭ | 321.5 | 0.463 | HOMO->LUMO (95%) |

**Table S2:** The total energy, number of imaginary frequencies and Standard Orientation of 4-DMABA which were computed with B3LYP/6-311++G** level of theory.

Charge = 0 Multiplicity = 1

Total energy = -554.955873285 A.U.

Number of imaginary frequencies = 0

Standard orientation:

----------------------------------------------------------------

Center Atomic Coordinates (Angstroms)

Number Number X Y Z

----------------------------------------------------------------

1 6 1.351140 -0.001373 -0.037050

2 6 0.599785 1.199251 -0.021676

3 6 -0.784326 1.174393 -0.009087

4 6 -1.487259 -0.037972 -0.004681

5 6 -0.751497 -1.230610 -0.008278

6 6 0.631030 -1.221951 -0.020883

7 6 -2.957353 -0.109785 0.009121

8 8 -3.614839 -1.128906 0.015805

9 8 -3.555819 1.116733 0.013444

10 7 2.727628 0.016166 -0.070884

11 6 3.477186 -1.226587 0.038158

12 1 4.540100 -1.009490 -0.053208

13 1 3.311638 -1.730796 0.999591

14 1 3.210105 -1.922174 -0.763306

15 6 3.444977 1.277462 0.038625

16 1 4.513338 1.087524 -0.049781

17 1 3.162395 1.965433 -0.764220

18 1 3.264319 1.778223 0.999192

19 1 -4.509364 0.951467 0.021997

20 1 -1.332159 2.108020 0.000444

21 1 -1.288211 -2.171686 0.001940

22 1 1.156851 -2.166201 -0.017174

23 1 1.100762 2.156939 -0.018768

----------------------------------------------------------------

**Table S3:** The total energy, number of imaginary frequencies and Standard Orientation of Ti+4-DMABA which were computed with B3LYP/6-311++G** level of theory.

Charge = 0 Multiplicity = 1

Total energy = -1708.083969 A.U.

Number of imaginary frequencies = 0

Standard orientation:

---------------------------------------------------------------- Center Atomic Coordinates (Angstroms)

Number Number X Y Z

---------------------------------------------------------------

1 6 3.635978 -0.007609 0.023715

2 6 2.888110 -1.211104 0.071310

3 6 1.506242 -1.190421 0.021542

4 6 0.803268 0.017412 -0.082454

5 6 1.533437 1.212167 -0.138878

6 6 2.915438 1.208147 -0.090679

7 1 3.392087 -2.163977 0.149788

8 1 0.948949 -2.118319 0.064143

9 1 0.997001 2.149340 -0.224781

10 1 3.441230 2.150991 -0.143057

11 6 -0.658801 0.031689 -0.133937

12 8 -1.327311 1.112793 -0.218239

13 8 -1.340671 -1.055683 -0.095860

14 7 5.009985 -0.019047 0.089910

15 6 5.761059 1.219838 -0.048254

16 1 6.821673 1.008407 0.076064

17 1 5.618074 1.684586 -1.032496

18 1 5.473896 1.946521 0.718399

19 6 5.731957 -1.282773 0.103177

20 1 6.798987 -1.081907 0.180967

21 1 5.444644 -1.897701 0.962305

22 1 5.559927 -1.867381 -0.809728

23 22 -3.160276 -0.029897 -0.196716

24 8 -3.366535 -0.466090 -1.946179

25 1 -2.917918 -1.192013 -2.391319

26 8 -2.771828 0.236758 2.098826

27 1 -3.173878 1.085540 2.319603

28 8 -4.040473 1.572104 -0.080968

29 1 -3.642423 2.387188 -0.405098

30 8 -4.257131 -1.265760 0.657775

31 1 -3.396739 -0.446153 2.386338

32 1 -4.777859 -1.911115 0.171165

----------------------------------------------------------------

**Table S4:** The total energy, number of imaginary frequencies and Standard Orientation of D1.1 which were computed with B3LYP/6-311++G** level of theory.

Charge = 0 Multiplicity = 1

Total energy = -633.595755985 A.U.

Number of imaginary frequencies = 0

Standard orientation:

---------------------------------------------------------------------

Center Atomic Coordinates (Angstroms)

Number Number X Y Z

----------------------------------------------------------------

1 6 1.104731 0.056989 -0.042614

2 6 0.345129 1.252332 -0.087748

3 6 -1.045356 1.180528 -0.062811

4 6 -1.701780 -0.051057 -0.004142

5 6 -0.946923 -1.223448 0.046532

6 6 0.445932 -1.193167 0.042291

7 6 -3.178719 -0.163511 0.012967

8 8 -3.802402 -1.200368 0.057522

9 8 -3.808023 1.042975 -0.026631

10 7 2.520376 0.178615 -0.096069

11 6 3.300084 -0.632949 -1.014845

12 1 4.172721 -0.056713 -1.343774

13 1 3.670978 -1.575465 -0.584357

14 1 2.705603 -0.866765 -1.899015

15 6 3.221269 0.567747 1.118096

16 1 4.152566 1.085701 0.864037

17 1 2.607117 1.245581 1.711006

18 1 3.478760 -0.295061 1.755145

19 1 -4.757859 0.856191 -0.014754

20 6 1.016563 2.598701 -0.203902

21 1 1.413766 2.944477 0.756573

22 1 1.858741 2.553887 -0.897432

23 1 0.307450 3.352053 -0.551731

24 6 1.198523 -2.496885 0.186468

25 1 1.626935 -2.838783 -0.760336

26 1 2.018622 -2.410111 0.902212

27 1 0.525509 -3.278970 0.541683

28 1 -1.627955 2.091709 -0.114281

29 1 -1.468899 -2.170559 0.118624

----------------------------------------------------------------

**Table S5:** The total energy, number of imaginary frequencies and Standard Orientation of D1.2 which were computed with B3LYP/6-311++G** level of theory.

Charge = 0 Multiplicity = 1

Total energy = -665.698861289 A.U.

Number of imaginary frequencies = 0

Standard orientation:

---------------------------------------------------------------------

Center Atomic Atomic Coordinates (Angstroms)

Number Number Type X Y Z

----------------------------------------------------------------

1 6 1.116007 0.090825 -0.024453

2 6 0.433314 -1.141459 0.033937

3 6 -0.967078 -1.164582 0.031935

4 6 -1.683289 0.031890 -0.001699

5 6 -1.023524 1.259228 -0.026661

6 6 0.374359 1.295435 -0.035482

7 6 -3.169002 0.048434 -0.003336

8 8 -3.857566 1.043018 -0.033758

9 8 -3.720839 -1.194986 0.033113

10 7 2.544797 0.209932 -0.074163

11 6 3.243486 -0.433210 -1.184026

12 1 4.216294 0.050432 -1.319534

13 1 3.420270 -1.511317 -1.050919

14 1 2.665983 -0.302568 -2.100294

15 6 3.240178 0.142153 1.207677

16 1 3.319523 -0.878971 1.621940

17 1 4.257937 0.527506 1.091837

18 1 2.721072 0.762850 1.939893

19 1 -4.680432 -1.067151 0.028009

20 1 -1.491878 -2.110678 0.065156

21 1 -1.603502 2.173637 -0.040798

22 7 1.138707 -2.350730 0.036125

23 1 2.047448 -2.326533 0.472325

24 1 0.598089 -3.145334 0.345861

25 7 1.057724 2.503842 -0.011405

26 1 0.560847 3.302103 -0.376266

27 1 2.020281 2.428166 -0.313306

----------------------------------------------------------------

**Table S6:** The total energy, number of imaginary frequencies and Standard Orientation of D1.3 which were computed with B3LYP/6-311++G** level of theory.

Charge = 0 Multiplicity = 1

Total energy = -705.437373234 A.U.

Number of imaginary frequencies = 0

Standard orientation:

---------------------------------------------------------------------

Center Atomic Coordinates (Angstroms)

Number Number X Y Z

----------------------------------------------------------------

1 6 -1.154752 0.039639 -0.046973

2 6 -0.414683 -1.159234 0.071558

3 6 0.976147 -1.169120 0.068864

4 6 1.684161 0.031562 -0.005141

5 6 0.984504 1.237707 -0.087889

6 6 -0.401978 1.238579 -0.117901

7 6 3.161118 0.080020 0.006691

8 8 3.828553 1.089578 -0.041550

9 8 3.737031 -1.151847 0.079308

10 7 -2.549284 0.090654 -0.122648

11 6 -3.286807 0.792477 0.921213

12 1 -4.237623 1.150236 0.515449

13 1 -3.502745 0.136782 1.779376

14 1 -2.724917 1.655996 1.269681

15 6 -3.303136 -0.956604 -0.796663

16 1 -4.211695 -0.507436 -1.211699

17 1 -2.721351 -1.366527 -1.621043

18 1 -3.593017 -1.783145 -0.135500

19 1 4.694103 -1.006705 0.084357

20 1 1.510731 -2.107287 0.162046

21 1 1.541710 2.165671 -0.156929

22 8 -1.110567 2.404425 -0.238684

23 1 -0.494312 3.139745 -0.322690

24 8 -1.126379 -2.324495 0.217504

25 1 -0.512434 -3.063352 0.280294

-----------------------------------------------------------------

**Table S7:** The total energy, number of imaginary frequencies and Standard Orientation of D1.4 which were computed with B3LYP/6-311++G** level of theory.

Charge = 0 Multiplicity = 1

Total energy = -753.479157758 A.U.

Number of imaginary frequencies = 0

Standard orientation:

---------------------------------------------------------------------

Center Atomic Coordinates (Angstroms)

Number Number X Y Z

----------------------------------------------------------------

1 6 1.577238 -0.006312 -0.029466

2 6 0.830455 -1.203808 0.044693

3 6 -0.547189 -1.156449 0.050289

4 6 -1.297579 0.028772 0.006115

5 6 -0.518735 1.196504 -0.047006

6 6 0.859009 1.210161 -0.072060

7 1 1.298797 -2.173903 0.110792

8 1 1.349951 2.169419 -0.131867

9 6 -2.777640 0.093294 0.053301

10 8 -3.420153 0.992869 0.539348

11 8 -3.368056 -0.979196 -0.531235

12 7 2.948034 -0.023236 -0.060582

13 6 3.694854 1.226903 -0.023424

14 1 4.759062 1.005984 -0.078134

15 1 3.442221 1.866347 -0.875162

16 1 3.508947 1.790616 0.899170

17 6 3.667192 -1.283324 0.065052

18 1 4.733367 -1.096047 -0.047831

19 1 3.504034 -1.757936 1.041063

20 1 3.368122 -1.988746 -0.716132

21 9 -1.135014 2.388450 -0.116938

22 9 -1.186984 -2.337449 0.149549

23 1 -4.322735 -0.855937 -0.421185

----------------------------------------------------------------

**Table S8:** The total energy, number of imaginary frequencies and Standard Orientation of D1.5 which were computed with B3LYP/6-311++G** level of theory.

Charge = 0 Multiplicity = 1

Total energy = -739.469257820 A.U.

Number of imaginary frequencies = 0

Standard orientation:

---------------------------------------------------------------------

Center Atomic Coordinates (Angstroms)

Number Number X Y Z

----------------------------------------------------------------

1 6 -1.711474 -0.013223 0.008979

2 6 -0.956565 -1.205613 -0.011725

3 6 0.438245 -1.186893 -0.008411

4 6 1.161396 0.025553 -0.001257

5 6 0.404346 1.216341 0.001455

6 6 -0.988766 1.199647 0.014884

7 1 -1.446602 -2.167191 -0.038522

8 1 -1.503820 2.148246 0.033816

9 6 2.645909 0.103048 -0.035578

10 8 3.268900 1.034282 -0.483167

11 8 3.236125 -0.985270 0.502789

12 7 -3.079167 -0.031624 0.020775

13 6 -3.830325 1.218300 0.006715

14 1 -4.894149 0.991734 0.020282

15 1 -3.605449 1.833171 0.884871

16 1 -3.620621 1.807694 -0.893020

17 6 -3.796529 -1.300832 -0.001763

18 1 -4.865505 -1.103850 0.040329

19 1 -3.591857 -1.868249 -0.917022

20 1 -3.535168 -1.925109 0.859313

21 1 4.193382 -0.881205 0.394043

22 6 1.007188 2.520071 0.039565

23 6 1.064722 -2.477878 -0.071691

24 7 1.361438 3.617272 0.098739

25 7 1.460687 -3.559714 -0.146384

----------------------------------------------------------------

**Table S9:** The total energy, number of imaginary frequencies and Standard Orientation of D1.6 which were computed with B3LYP/6-311++G** level of theory.

Charge = 0 Multiplicity = 1

Total energy = -964.054375170 A.U.

Number of imaginary frequencies = 0

Standard orientation:

---------------------------------------------------------------------

Center Atomic Coordinates (Angstroms)

Number Number X Y Z

----------------------------------------------------------------

1 6 -1.911041 -0.009321 -0.020404

2 6 -1.178379 1.197395 -0.013293

3 6 0.204520 1.177100 -0.003134

4 6 0.973818 0.010410 -0.019183

5 6 0.221680 -1.167762 -0.021630

6 6 -1.162395 -1.205039 -0.007777

7 1 -1.666072 2.159618 -0.005800

8 1 -1.636891 -2.173599 0.005339

9 6 2.481101 0.045996 -0.108999

10 8 3.076954 0.441837 -1.072500

11 8 3.054663 -0.407302 1.018517

12 7 -3.280159 -0.018915 -0.037505

13 6 -4.001168 -1.281841 0.061225

14 1 -5.070009 -1.082621 0.023516

15 1 -3.755331 -1.948741 -0.771812

16 1 -3.784317 -1.805305 1.000105

17 6 -4.019573 1.236723 -0.006917

18 1 -5.082876 1.022991 -0.092783

19 1 -3.856440 1.788981 0.926962

20 1 -3.739872 1.882684 -0.844989

21 1 4.015214 -0.387711 0.885551

22 7 0.905074 -2.486623 -0.087348

23 7 0.872627 2.502433 0.094139

24 8 0.293910 3.460763 -0.396754

25 8 1.939171 2.547642 0.685696

26 8 2.002517 -2.524067 -0.620497

27 8 0.313088 -3.450940 0.376737

----------------------------------------------------------------

**Table S10:** The total energy, number of imaginary frequencies and Standard Orientation of D1.7 which were computed with B3LYP/6-311++G** level of theory.

Charge = 0 Multiplicity = 1

Total energy = -818.109046757 A.U.

Number of imaginary frequencies = 0

Standard orientation:

---------------------------------------------------------------------

Center Atomic Coordinates (Angstroms)

Number Number X Y Z

----------------------------------------------------------------

1 6 -1.483675 -0.084878 -0.029670

2 6 -0.719308 -1.273685 -0.077224

3 6 0.686887 -1.186665 -0.038082

4 6 1.338473 0.055787 -0.016529

5 6 0.566058 1.224694 0.016036

6 6 -0.843246 1.170135 0.058525

7 6 2.835559 0.154528 -0.081287

8 8 3.432728 0.788477 -0.910573

9 8 3.428304 -0.550345 0.901346

10 7 -2.892381 -0.201854 -0.086081

11 6 -3.669300 0.560657 -1.050807

12 1 -4.499511 -0.058902 -1.408409

13 1 -4.099338 1.489322 -0.648830

14 1 -3.049670 0.811387 -1.912595

15 6 -3.614336 -0.635134 1.101285

16 1 -4.516033 -1.185007 0.811806

17 1 -2.993320 -1.297638 1.704498

18 1 -3.923495 0.208263 1.739193

19 1 4.387830 -0.493088 0.769786

20 6 1.206404 2.505456 0.086963

21 6 1.447736 -2.399629 -0.103563

22 7 1.674033 3.558637 0.165919

23 7 2.024982 -3.397792 -0.172310

24 6 -1.387937 -2.616620 -0.195750

25 1 -1.542113 -3.070132 0.789715

26 1 -2.363612 -2.508798 -0.668048

27 1 -0.778308 -3.312848 -0.772187

28 6 -1.635598 2.439411 0.240167

29 1 -1.936209 2.870128 -0.720241

30 1 -2.540054 2.249621 0.816665

31 1 -1.047162 3.195361 0.759381

----------------------------------------------------------------
