# Supplementary figures and images for: DFT Studies of p-N,N-(Dimethylamino) Benzoic Acid with Para or Meta–Electron Withdrawing or Donating Moieties for Dye-Sensitized Solar Cells (DSSCs)
Source: Hindawi journal article supplement (doi:10.1155/2022/2916191), 2022-10-22

Spectrum

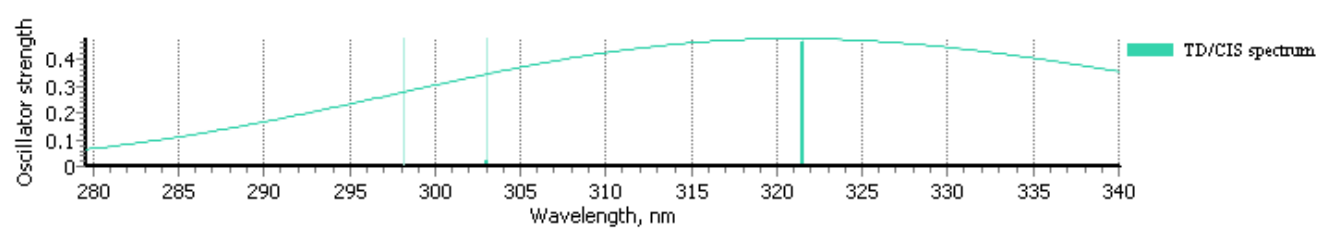

Supplement: f1 [file 2916191.f1.zip]

Spectrum

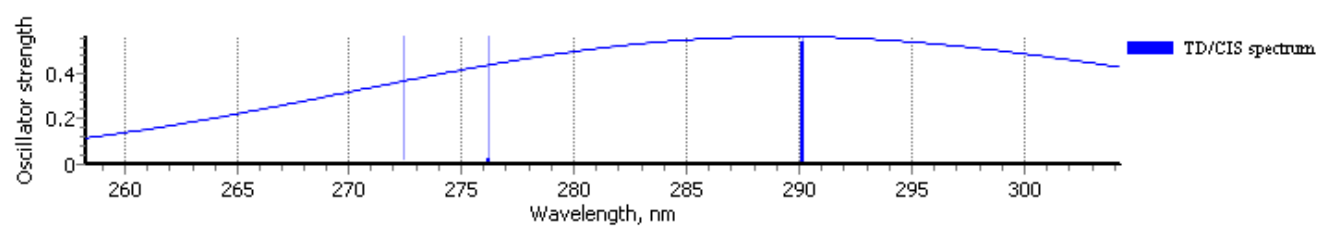

Supplement: f1 [file 2916191.f1.zip › Fig.S1 (1).pdf]
